# Supplementary material
Source: publisher figshare collection journal article supplement (https://acs.figshare.com/ndownloader/files/4399360)
Supplement: Supplementary file 1 [file 4399360]

## Supplementary information

# Probing the Anions Mediated Associative Behavior of Tin-12 Oxo-Macrocations by Pulsed Field Gradient NMR Spectroscopy

*Luk Van Lokeren, Rudolph Willem, David van der Beek, Patrick Davidson, Gareth A. Morris,*

*François Ribot\**

(francois.ribot@upmc.fr)

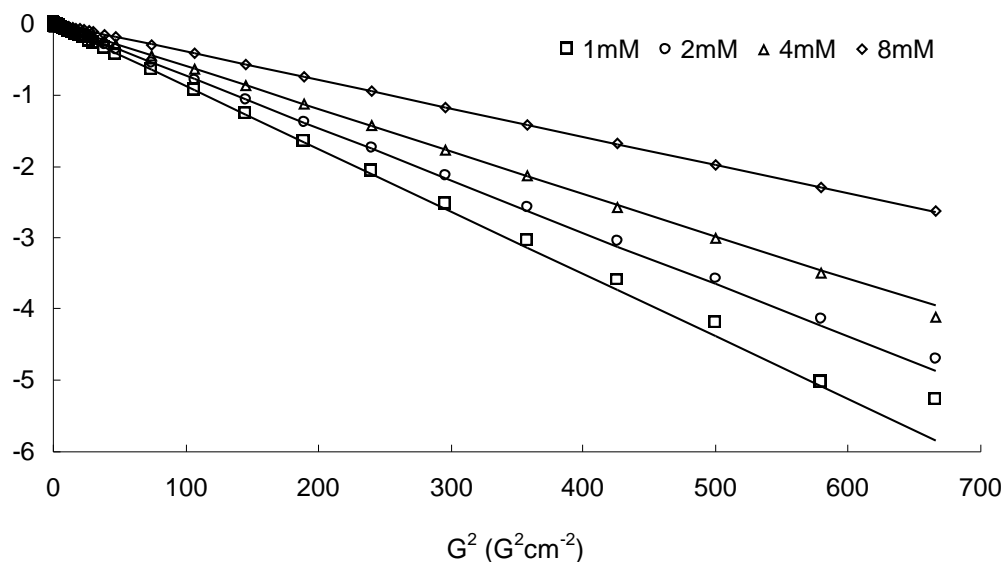

**Figure S1.**  $\ln(I/I_0)$  vs.  $G^2$  for  $\{(\text{BuSn})_{12}\text{O}_{14}(\text{OH})_6\}(\text{C}_2\text{O}_4)$  at 1, 2, 4 and 8 mM in chloroform-*d* for  $\Delta = 400$  ms and  $\delta = 2.82$  ms. The line represents the least square fit on  $I$  vs.  $G$ .

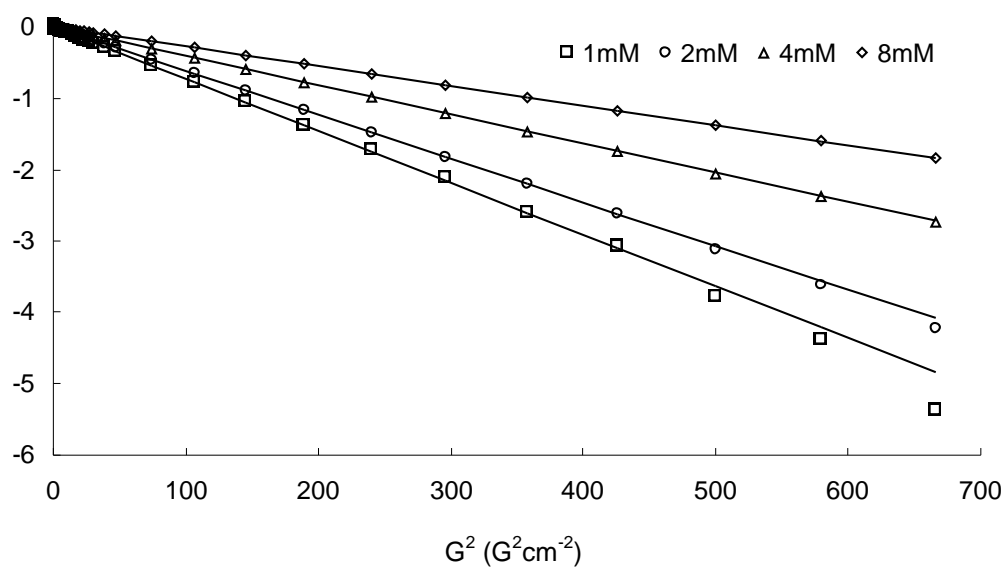

**Figure S2.**  $\ln(I/I_0)$  vs.  $G^2$  for  $\{(\text{BuSn})_{12}\text{O}_{14}(\text{OH})_6\}(\text{SO}_4)$  at 1, 2, 4 and 8 mM in chloroform-*d* for  $\Delta = 400$  ms and  $\delta = 2.82$  ms. The line represents the least square fit on  $I$  vs.  $G$ .
